# Supplementary material
Source: MDPI journal article supplement (https://www.mdpi.com/2079-6412/9/3/170)
Supplement: s1 [file s1]

## Supplementary Materials

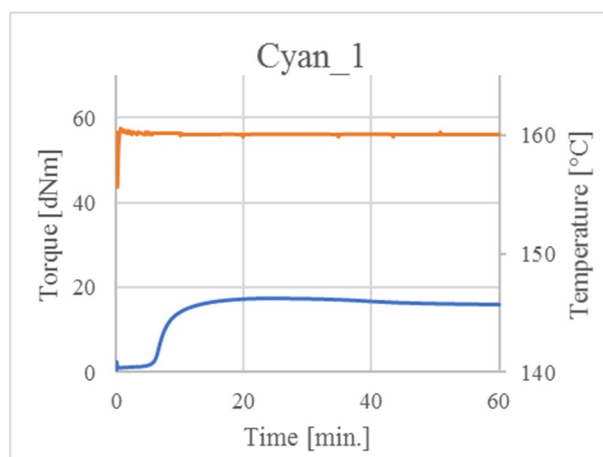

**Figure S1.** Vulcanization kinetics of the Cyan\_1 composite mix (blue) and temperature of upper plate of the rheometer (orange) measured 24 h after preparation.

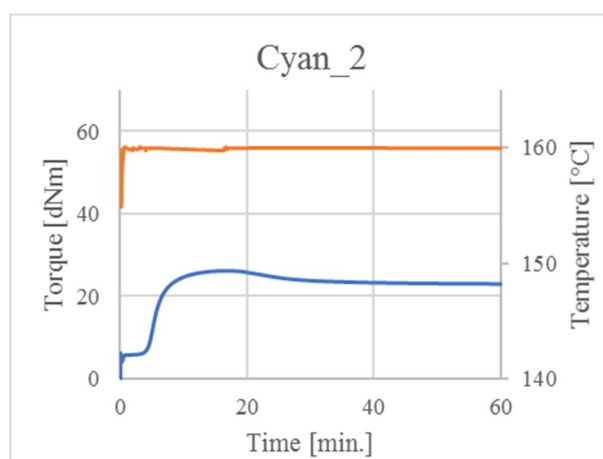

**Figure S2.** Vulcanization kinetics of the Cyan\_2 composite mix (blue) and temperature of upper plate of the rheometer (orange) measured 24 h after preparation.

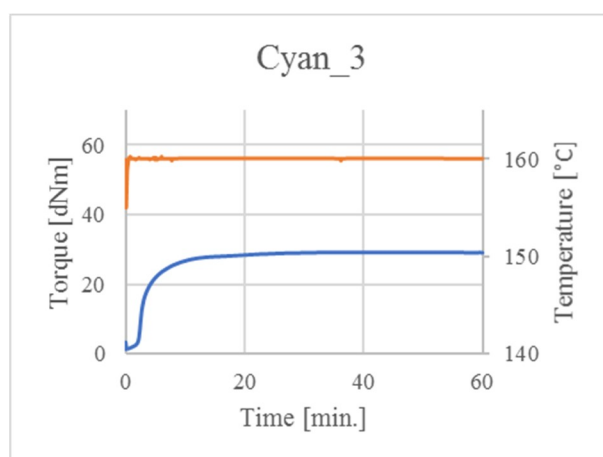

**Figure S3.** Vulcanization kinetics of the Cyan\_3 composite mix (blue) and temperature of upper plate of the rheometer (orange) measured 24 h after preparation.

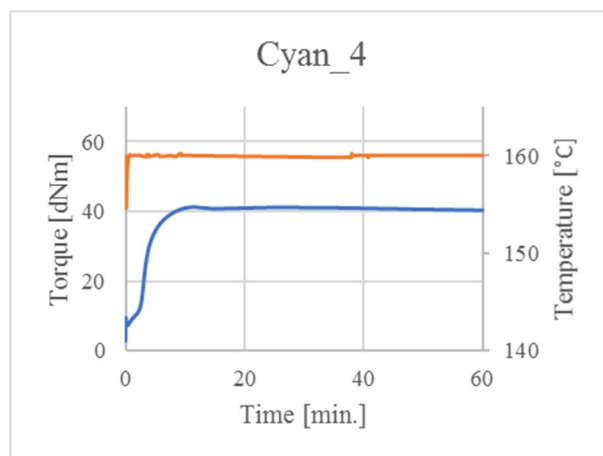

**Figure S4.** Vulcanization kinetics of the Cyan\_4 composite mix (blue) and temperature of upper plate of the rheometer (orange) measured 24 h after preparation.

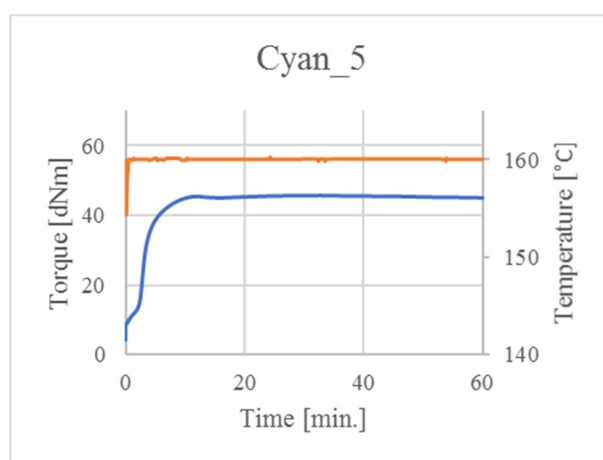

**Figure S5.** Vulcanization kinetics of the Cyan\_5 composite mix (blue) and temperature of upper plate of the rheometer (orange) measured 24 h after preparation.

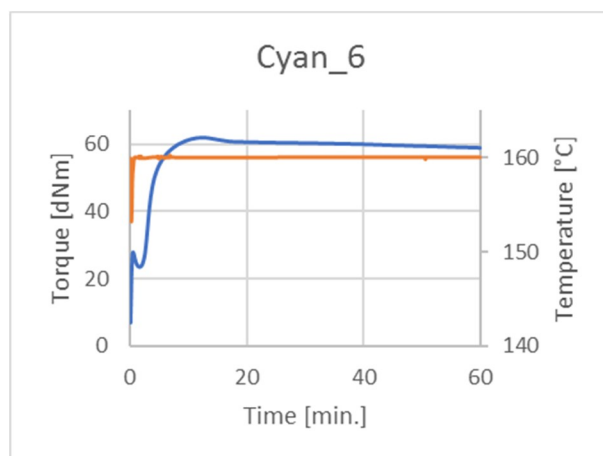

**Figure S6.** Vulcanization kinetics of the Cyan\_6 composite mix (blue) and temperature of upper plate of the rheometer (orange) measured 24 h after preparation.
